# Supplementary material for: Altemeier’s procedure for complete rectal prolapse; outcome and function in 43 consecutive female patients
Source: BMC Surg. 2019 Jan 3;19:1. doi: 10.1186/s12893-018-0463-7 (PMC6318906; doi:10.1186/s12893-018-0463-7)
Supplement: Supplementary file 1 — Data on follow-up and recurrences. Pre and post-operative functional scores and data above recurrences and time to recurrences collected from each patient. (XLSX 20 kb) [file 12893_2018_463_MOESM1_ESM.xlsx]

## Sheet: Foglio1
diagnosis	YEAR	case	pre/post-op	AGE	DELIVERIES	previous PERINEAL SURGERY	SELF AUTONOMY	YEARS OF SYMPTOMS	FECAL INCONTINENCE	STIPSIS	NORMAL FECAL CONTINENCE	reCtorragia	URINARY INCONTINENCE	LEVETORPLASTY	LENGHT OF RECTO-SIGMOID RESECTED SPECIMEN	ods SCORE	Vazey score	ICIQ score	urinary retention score	POP Q score	patient satisfaction	recurrence	recurrence (months after surgery)
Full rectal prolapse	2012	1	pre	70	2 e	isterectomy	1	5	1	0	0	1	0	0	15-20 (ap 5)	0	20	0	0	0	5	1	18
	post	1	post													1	9	0	0	0
Full rectal prolapse	2012	2	pre	76	2 cesarei	0	1	2	1	0	0	?	0	0	.50 (18 ap)	9	10	0	0	0
	post	2	post													8	8	3	0	0	5	1	5
Full rectal prolapse	2012	3	pre	79	2	isterectomy	1	?	0	0	1	?	0	1	(18 ap)	2	4	0	1	0	10	1	12
	post	3	post													2	4	0	1	0
Full rectal prolapse + uterin prolapse	2012	4	pre	89	3 e	bladder plastic	0.5	3	1	1	0	1	1	0	40 (28 ap)	8	23	11	0	4
	post	4	post								1		1			1	9	10	0	0		0
full rectal prolapse	2010	5	pre	81	2e	isterectomy	1	1	0	1	0	1	0	1	20-25 (22 ap)	4	0	10	0	0
	post	5	post													2	0	10	0	0	5	1	24
full rectal prolapse	2012	6	pre	72	3e + lacer	uterin prolapse plastic	1	4	0	1	0	?	0	1	20-25 (12 ap)	13	6	0	0	2	10	0
	post	6	post													0	2	0	0	2
full rectal prolapse	2012	7	pre	86	5	isterectomy	0	1	0	1	0	1	1	1	10 ap	11	0	6	0	0	10	0
	post	7	post													6	0	6	0	0
full rectal prolapse	2011	8	pre	83	2e	0	0.5	?	1	1	0	?	0	1	20 (9 ap)	14	4	0	0	0		0
	post	8	post													12	4	0	0	0
full rectal prolapse	2011	9	pre	72	4e	0	?	20	0	0	1	?	0	1	25 (9 ap)	3	7	0	0	0		0
	post	9	post													2	0	0	0	0
full rectal prolapse	2011	10	pre	68	2e	isterectomy	1	1	0	1	0	0	0	1	15 (8 ap)	7	2	13	0	0	10	0
	post	10	post													5	15	20	0	0
full rectal prolapse	2010	11	pre	45	0	0	1	1	0	1	0	0	0	0	15-18 (5 ap)	3	0	0	0	0		0
	post	11	post													2	4	0	0	0
full rectal prolapse	2008	12	pre	70	0	isterectomy	0	2	0	0	1	?	0	0	.25	5	8	0	0	0	5	1	12
	post	12	post													5	8	0	0	0
full rectal prolapse + cistocele + vaginal prolapse	2008	13	pre	86	2e	isterectomy	1	?	0	1	0	?	0	1	.30	12	4	12	0	4	8	0
	post	13	post													1	4	12	0	4
full rectal prolapse	2007	14	pre	62	2e	0	?	3	1	0	0	?	0	1	sigma medio	0	19	0	0	0		1	12
	post	14	post													0	18	0	0	0
full rectal prolapse	2007	15	pre	70	0e	isterectomy	1	?	?	?	0	?	0	1	.20	12	0	0	0	0	10	0
	post	15	post													6	0	0	0	0
full rectal prolapse	2013	16	pre	44	0	0	0	<1	1	0	0	1	1	0	.40(ap 16)	3	13	12	0	0	8	1	36
	post	16	post													1	3	13	0	0
full rectal prolapse	2013	17	pre	78	1e	isterectomy	1	>1	1	0	0	1	0	0	.20	5	16	11	0	0	10	0
	post	17	post													5	16	11	0	0
full rectal prolapse + enterocele	2013	18	pre	74	2e	isterectomy	1	3	1	0	0	?	0	1	20-25 (9ap)	1	14	0	0	0	8	0
	post	18	post													0	3	0	0	0
full rectal prolapse	2015	19	pre	74	2e	0	1	3	1	0	0	?	0	1	.20 (6,5 ap)	12	20	0	0	0	9	0
	post	19	post													3	2	0	0	0
full rectal prolapse	2016	20	pre	87	3e	bladder plastic	0.5	1	0	0	1	?	0	0	.15 (4,8ap)	0	2	0	0	0	10	0
	post	20	post													0	2	0	0	0
full rectal prolapse	2016	21	pre	69	1e	bladder plastic + isterectomy	1	2	0	1	0	0	0	1	40 (12 ap)	9	2	5	0	2	8	0
	post	21	post													1	9	5	0	2
full rectal prolapse	2015	22	pre	77	2e	isterectomy + gatekeeper	1	>1	1	0	0	?	0	1	.20 (6ap)	12	10	0	0	0	8	0
	post	22	post													8	4	0	0	0
full rectal prolapse	2015	23	pre	85	0	0	0.5	1	0	0	1	0	1	1	8 ap	0	7	6	3	0	10	0
	post	23	post													0	17	6	0	0
recurrent full rectal prolapse	2011	24	pre	85	0	isterectomy + STARR	1	?	0	0	1	?	0	1	7 ap	9	3	0	0	0	10	0
	post	24	post													2	4	0	0	0
recurrent full rectal prolapse	2012	25	pre	83	2 e	isterectomy + surgery for rectal prolapse + bladder plastic	0.5	2	1	0	0	?	1	0	.12 (8 ap)	0	19	10	0	0
	post	25	M													0	19	10	0	0	8	0
recurrent full rectal prolapse	2010	26	pre	81	0	isterectomy + bladder plastic + delorme	1	1	?	1	?	?	?	1	?giunto (3 ap)	15	4	6	0	0	2	1	6
	post	26	IC													8	4	6	0	0
full rectal prolapse	2009	27	pre	68	2e	isterectomy	1	3	1	1	0	1	0	1	.30	5	12	0	0	0	10	1	24
	post	27	L													4	6	0	0	0
full rectal prolapse	2009	28	pre	80	2e	isterectomy + wells	?	1	0	1	0	0	1	0	.15	14	6	6	0	0	7	1	12
	post	28	C													17	10	10	0	0
recurrent full rectal prolapse	2005	29	pre	86	1	isterectomy + delorme	1	1	1	0	0	0	0	0	.10-12	13	16	12	0	4	8	1	18
	post	29	B													8	18	12	0	4
FULL RECTAL PROLAPSE	2013	30	pre	74	2e	isterectomy + rectal prolapse surgery	1	3	0	1	0	1	0	1	15(ap 5)	21	0	0	0	0	4	0
	post	30	V													1	24	6	0	0
recurrent full rectal prolapse	2014	31	pre	86	2e	bladder plastic + delorme + isterectomy	1	1	0	1	0	0	1	1	.8(5 ap)	17	4	21	0	0	8	0
	post	31	O													17	20	21	0	0
recurrent full rectal prolapse	2014	32	pre	62	0	rectopexy	1	3	0	0	1	1	0	0	.10 (6 ap)	11	7	0	1	0	7	0
	post	32	MR													15	16	0	1	0
FULL RECTAL PROLAPSE	2015	33	pre	73	5e	isterectomy + bladder plastic + STARR	1	1	1	0	0	1	0	1	.20 (5,5 ap)	0	22	10	0	0	3	1	12
	post	33	R													0	22	10	0	0
recurrent full rectal prolapse	2005	34	pre	89	2	bladder plastic+isterectomy+anal encirclement+ recto-sigmoidectomy	1	?	0	0	1	?	0	0	?	1	14	0	0	0	10	0
	post	34	post													1	14	0	0	0
7 recidiva	28
6 recdiva	46.1538
		tot rec	34.2105
34.2105
10.5263
non riducibile
